# Supplementary material for: Engineered protein–iron oxide hybrid biomaterial for MRI-traceable drug encapsulation
Source: Royal Society of Chemistry journal article supplement (doi:10.1039/d2me00002d), 2022-01-01
Supplement: d2me00002d1.pdf [file d2me00002d1.pdf]

# Engineered Protein-Iron Oxide Hybrid Biomaterial for MRI-traceable Drug Encapsulation

*Lindsay K. Hill<sup>†,‡,§,¶,□</sup>, Dustin Britton<sup>†,□</sup>, Teeba Jihad<sup>†</sup>, Kamia Punia, Xuan Xie<sup>†</sup>, Erika Delgado-Fukushima<sup>†</sup>, Che Fu Liu<sup>†</sup>, Orin Mishkit<sup>§,¶</sup>, Chengliang Liu<sup>†</sup>, Chunhua Hu<sup>∇</sup>, Michael Meleties<sup>†</sup>, P. Douglas Renfrew<sup>||</sup>, Richard Bonneau<sup>||,⊥,#</sup>, Youssef Z. Wadghiri<sup>§,¶</sup>, and Jin Kim Montclare<sup>†,¶,∇,\*</sup>*

<sup>†</sup>. Department of Chemical and Biomolecular Engineering, New York University Tandon School of Engineering, Brooklyn, New York, 11201, USA

<sup>‡</sup>. Department of Biomedical Engineering, SUNY Downstate Medical Center, Brooklyn, New York, 11203, USA

<sup>§</sup>. Center for Advanced Imaging Innovation and Research (CAI<sup>2</sup>R), New York University School of Medicine, New York, New York, 10016, USA

<sup>¶</sup>. Bernard and Irene Schwartz Center for Biomedical Imaging, Department of Radiology, New York University School of Medicine, New York, New York, 10016, USA

<sup>||</sup>. Center for Computational Biology, Flatiron Institute, Simons Foundation, New York, New York, 10010, USA

<sup>⊥</sup>. Center for Genomics and Systems Biology, New York University, New York, New York, 10003, USA

<sup>#</sup>. Courant Institute of Mathematical Sciences, Computer Science Department, New York University, New York, New York, 10009, USA

<sup>∇</sup>. Department of Chemistry, New York University, New York, New York, 10012, USA

<sup>°</sup>. Department of Biomaterials, New York University College of Dentistry, New York, New York, 10010, USA

<sup>□</sup> Equal contribution

\* Corresponding author

Email: Montclare@nyu.edu

## SUPPORTING INFORMATION

### Determination of Q protein's binding capacity for doxorubicin

The optimal Q protein-to-doxorubicin (Dox) binding ratio was assessed *via* spectrophotometric assay using Q<sub>WT</sub> protein at 10  $\mu$ M and 0-100  $\mu$ M DMSO-dissolved Dox, in 50 mM PB pH 7.4 containing 1% v/v DMSO. The fluorescence intensity of all conditions was assessed spectrophotometrically at 600 nm following overnight (16 hr) binding at 300 rpm and room temperature (**Figure S4**). While an initial plateau in fluorescence intensity occurred at 1:2, the fluorescence was fully saturated at 1:7.5 Q:Dox. Therefore, a 1:5 Q:Dox ratio was considered the near-saturation ratio and used for all Dox binding studies.

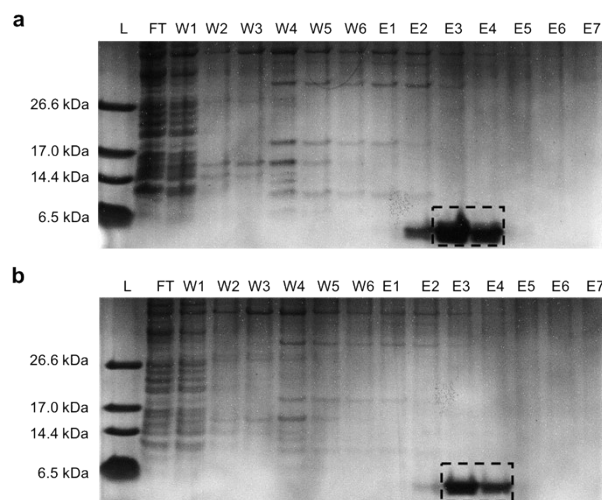

**Figure S1.** 12% SDS-PAGE of (a) Q<sub>WT</sub> and (b) Q<sub>AHA</sub> purified under denaturing conditions *via* immobilized metal affinity chromatography with the following samples: L: ladder, FT: flow through, W1-W3: washes 1-3 using purification buffer with 0 mM imidazole, W4-W6: washes 4-6 using 5 mM imidazole, and E1-E7: elutions 1-7 containing 10, 20, 50, 100, 200, 500, and 500 mM imidazole, respectively. Dashed boxes illustrate elution fractions collected.

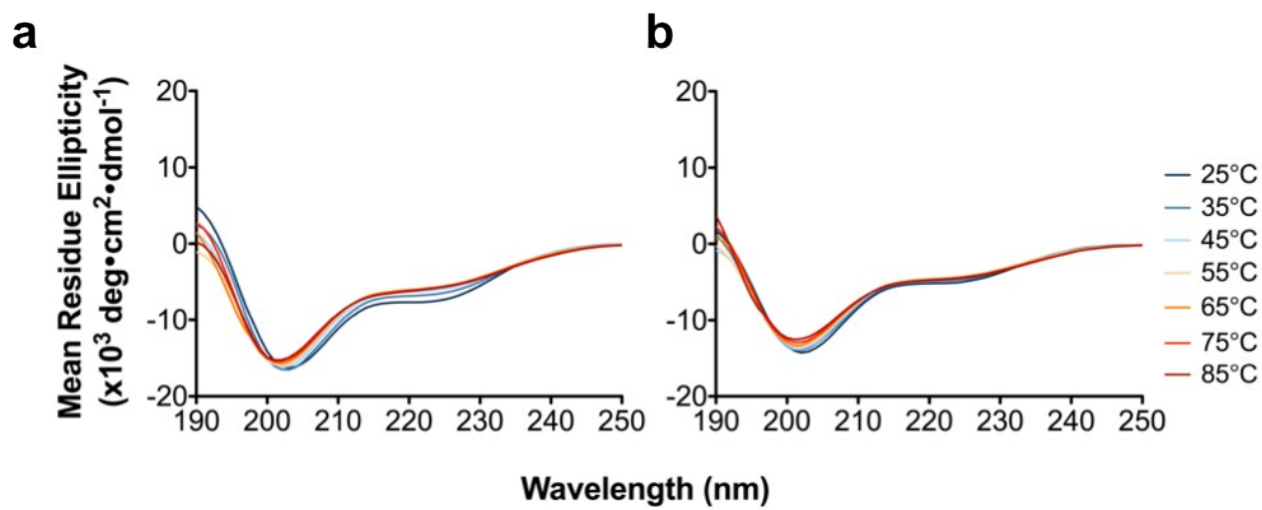

**Figure S2.** Circular dichroism (CD) of (a) Q<sub>WT</sub> and (b) Q<sub>AHA</sub> at pH 4.0 acquired every 10°C from 25°C to 85°C. Data depict the average of three independent trials.

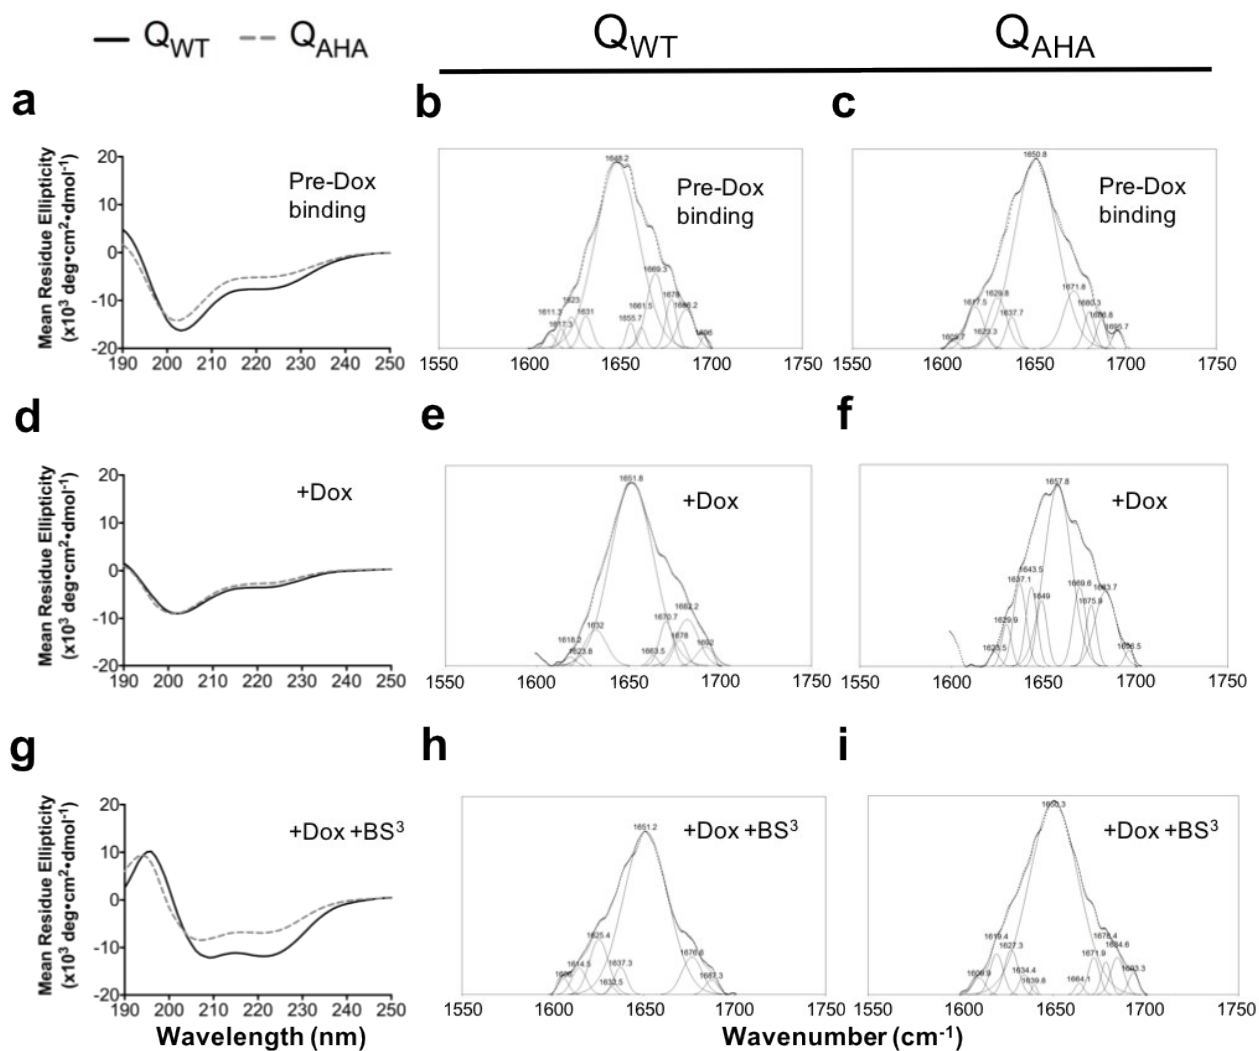

**Figure S3.** Secondary structure of Q proteins pre- and post-Dox binding and crosslinking. CD wavelength scans and ATR-FTIR spectra acquired for Q<sub>WT</sub> and Q<sub>AHA</sub> (a-c) at pH 4.0 prior to Dox binding, (d-f) Dox-bound, and (g-i) Dox-bound and crosslinked. All CD data depict the average of three independent trials and all ATR-FTIR spectra represent two independent trials.

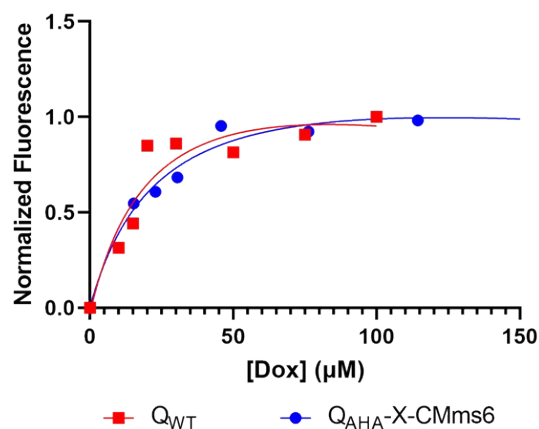

**Figure S4.** Assessment of Q<sub>WT</sub>:Dox and Q<sub>AHA-X-CMms6</sub>:Dox binding ratio. Normalized fluorescence intensity following overnight (16 hr) incubation of 10 μM Q<sub>WT</sub> protein bound to increasing concentrations of Dox to assess the optimal molar ratio for Dox binding by Q. Binding affinities (K<sub>d</sub>) are 24.3 μM Dox and 26.0 μM Dox for Q<sub>WT</sub> and Q<sub>AHA-X-CMms6</sub> respectively indicating saturation at 50 μM or a 1:5 ratio of Dox-to-protein.

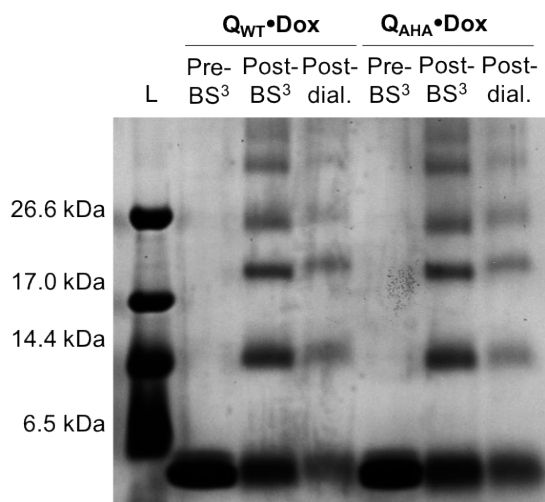

**Figure S5.** 12% SDS-PAGE including ladder (L) and Dox-bound Q<sub>WT</sub> and Q<sub>AHA</sub> mesofibers (Q<sub>WT</sub>•Dox and Q<sub>AHA</sub>•Dox) pre- and post-BS<sup>3</sup> chemical crosslinking and following subsequent dialysis.

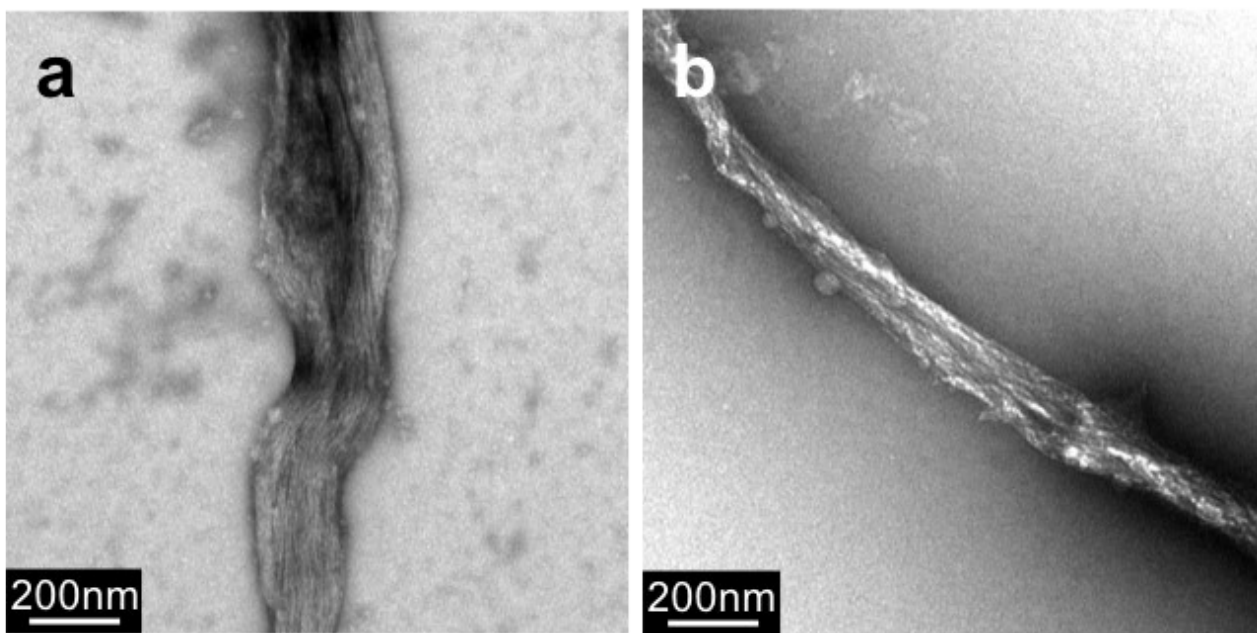

**Figure S6.** Fiber maintenance under Dox binding conditions in the absence of Dox. Uranyl-acetate-stained TEM following overnight incubation in 50 mM PB pH 7.4 + 1% DMSO of (a)  $Q_{WT}$  and (b)  $Q_{AHA}$  to confirm nanofiber assembly is maintained under binding conditions in the absence of Dox.

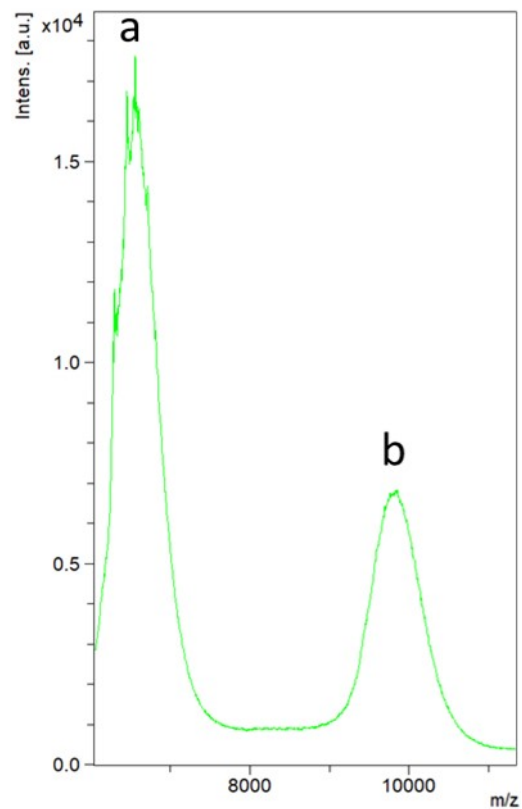

**Figure S7.** MALDI-TOF spectra after crosslinking of Q<sub>AHA</sub> and clicking to CMms6 and before dialysis showing a m/z difference corresponding to 2.9 kDa. **a.** Unreacted Q<sub>AHA</sub> 6.4 kDa. **b)** Q<sub>AHA</sub> reacted with one CMms6 peptide

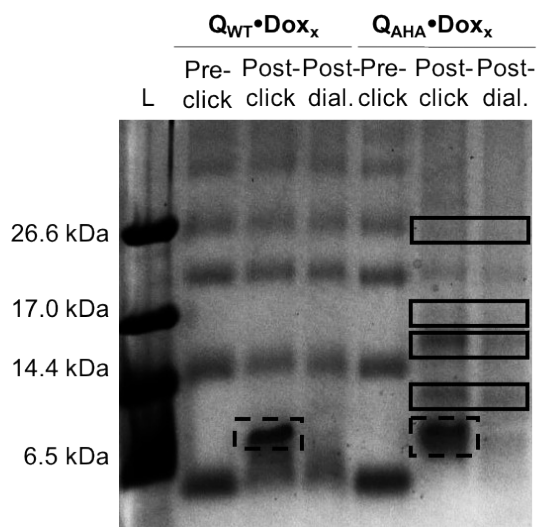

**Figure S8.** SDS-PAGE assessment of azide-alkyne cycloaddition reaction. 12% SDS-PAGE including ladder (L) and crosslinked Q<sub>WT</sub> and Q<sub>AHA</sub> mesofibers (Q<sub>WT</sub>•Dox<sub>x</sub> and Q<sub>AHA</sub>•Dox<sub>x</sub>) pre and post-copper-catalyzed azide-alkyne cycloaddition reaction with alkyne-bearing CMms6 peptide and following subsequent dialysis. Unreacted prg-CMms6 is shown with dashed boxes while solid boxes highlight the clicked product, dubbed Q<sub>AHA</sub>-X-CMms6.

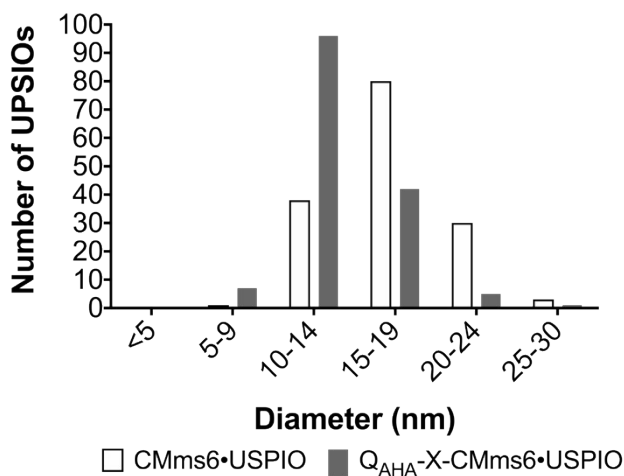

**Figure S9.** Size distribution of USPIOs visualized on brightfield TEM following co-precipitation reaction in the presence of CMms6 alone (CMms6•USPIO) or CMms6-conjugated Q<sub>AHA</sub>-X-CMms6 (Q<sub>AHA</sub>-X-CMms6•USPIO).



## Feraheme

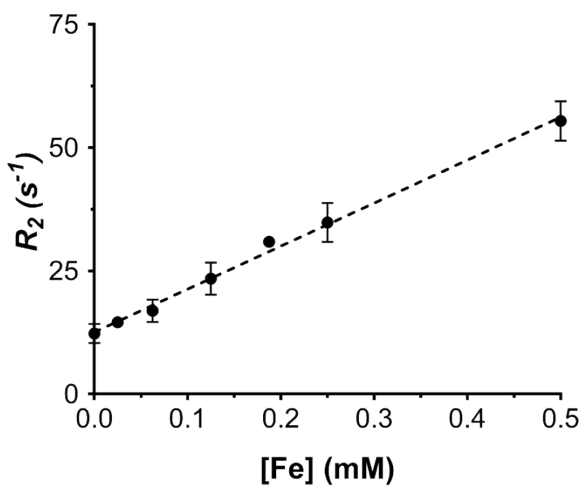

## Q<sub>AHA</sub>-X-CMms6•USPIO

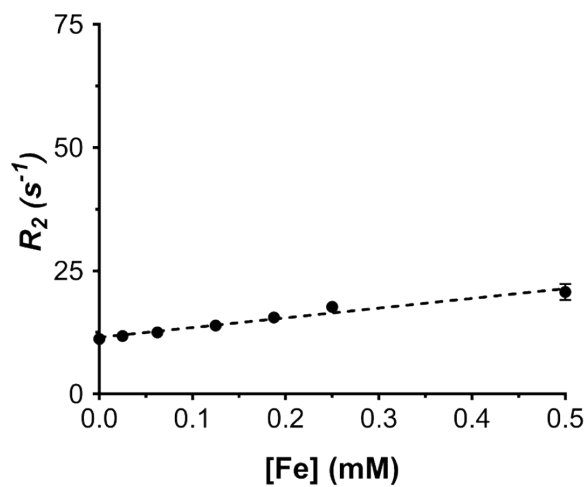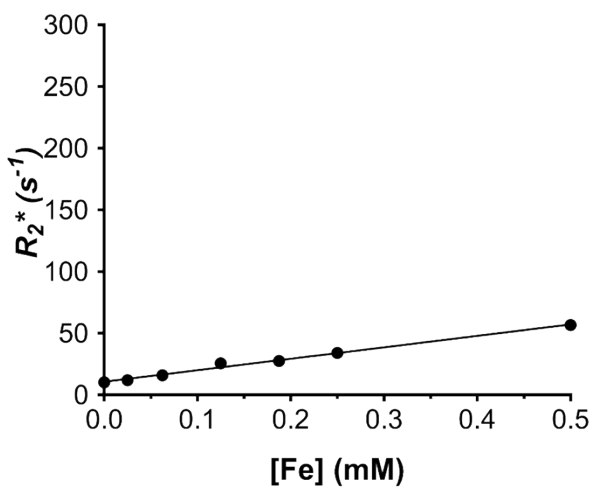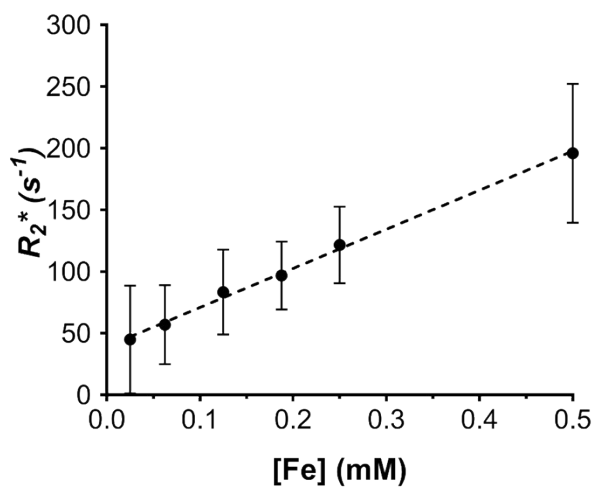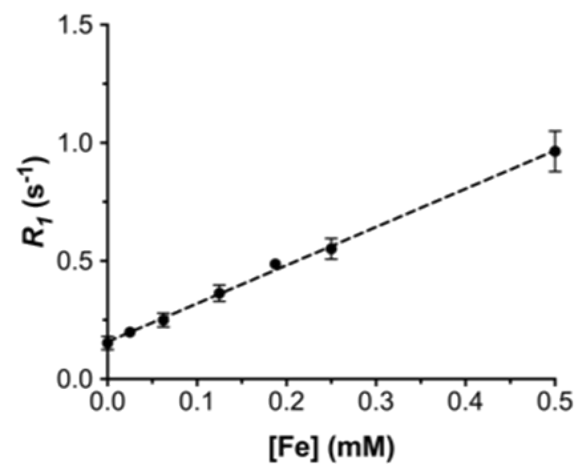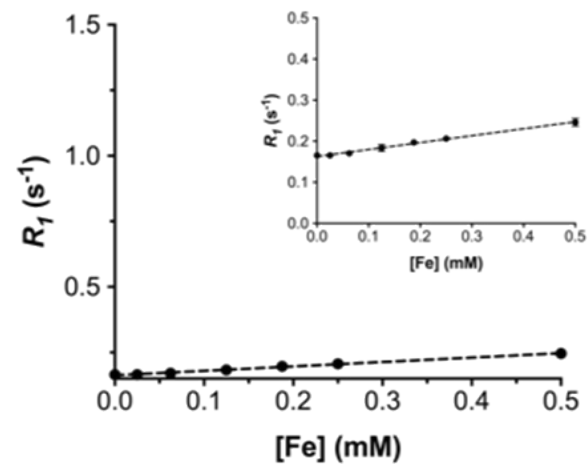

**Figure S10.** Relaxation curves from magnetic resonance relaxometry. Relaxation rates,  $R_2$ ,  $R_2^*$  and  $R_1$ , as a function of iron concentration in Feraheme and Q<sub>AHA</sub>-X-CMms6•USPIO. All data depict the average and standard deviation of three independent trials. Note the low  $R_1$  relaxivity of Q<sub>AHA</sub>-X-CMms6•USPIO reflected by the weak slope in comparison to Feraheme. This was confirmed *in vivo* in tissue muscle

**Table S1.** Protein expression yield. Average Q<sub>WT</sub> and Q<sub>AHA</sub> yields from expression in M15MA *E.coli*. Data is reported as the mean value  $\pm$  standard deviation.

| Protein          | Yield (mg L <sup>-1</sup> ) |
|------------------|-----------------------------|
| Q <sub>WT</sub>  | 17.82 $\pm$ 4.44 (N=14)     |
| Q <sub>AHA</sub> | 8.70 $\pm$ 1.58 (N=12)      |

**Table S2.** AHA Incorporation into the Q protein. Percent AHA incorporated into Q<sub>AHA</sub> determined by MALDI-TOF MS and amino acid analysis. MALDI-TOF MS data is reported as the mean value  $\pm$  standard deviation of six independent trails.

| Method                                          | AHA Incorporation (%)  |
|-------------------------------------------------|------------------------|
| MALDI-TOF MS                                    | 88.53 $\pm$ 5.03 (N=6) |
| Amino Acid Analysis<br>(UC Davis Genome Center) | 90.00                  |

**Table S3.** Secondary structure of Q proteins in response to temperature. Mean residue ellipticity values from CD of Q<sub>WT</sub> and Q<sub>AHA</sub> at pH 4.0 from 25°C to 85°C and corresponding predicted secondary structure composition from CONTIN/LL assessment of the spectra. Data is reported as the average of three independent trials.

|      |                  | $\Theta \times 10^3$ (deg·cm <sup>2</sup> ·dmol <sup>-1</sup> ) |                 |                                | % composition   |                  |           |
|------|------------------|-----------------------------------------------------------------|-----------------|--------------------------------|-----------------|------------------|-----------|
|      |                  | $\Theta_{222}$                                                  | $\Theta_{\min}$ | $\Theta_{222} / \Theta_{\min}$ | $\alpha$ -helix | $\beta$ -content | unordered |
| 25°C | Q <sub>WT</sub>  | -7.63                                                           | -16.28          | 0.47                           | 56              | 21               | 23        |
|      | Q <sub>AHA</sub> | -5.15                                                           | -14.25          | 0.36                           | 55              | 24               | 21        |
| 35°C | Q <sub>WT</sub>  | -6.76                                                           | -16.54          | 0.41                           | 67              | 33               | -         |
|      | Q <sub>AHA</sub> | -4.80                                                           | -13.95          | 0.34                           | 55              | 26               | 20        |
| 45°C | Q <sub>WT</sub>  | -6.19                                                           | -16.13          | 0.38                           | 55              | 17               | 27        |
|      | Q <sub>AHA</sub> | -4.59                                                           | -13.77          | 0.33                           | 51              | 49               | -         |
| 55°C | Q <sub>WT</sub>  | -5.92                                                           | -15.93          | 0.37                           | 69              | 31               | -         |
|      | Q <sub>AHA</sub> | -4.50                                                           | -13.43          | 0.33                           | 49              | 39               | 12        |
| 65°C | Q <sub>WT</sub>  | -5.89                                                           | -15.68          | 0.38                           | 51              | 28               | 21        |
|      | Q <sub>AHA</sub> | -4.54                                                           | -13.29          | 0.34                           | 52              | 34               | 14        |
| 75°C | Q <sub>WT</sub>  | -5.94                                                           | -15.43          | 0.38                           | 46              | 18               | 36        |
|      | Q <sub>AHA</sub> | -4.62                                                           | -12.86          | 0.36                           | 50              | 25               | 25        |
| 85°C | Q <sub>WT</sub>  | -6.02                                                           | -15.24          | 0.39                           | 54              | 34               | 13        |
|      | Q <sub>AHA</sub> | -4.64                                                           | -12.51          | 0.37                           | 48              | 19               | 32        |

**Table S4.** Mean residue ellipticity values from CD of Q proteins. Mean residue ellipticity values of Q<sub>WT</sub> and Q<sub>AHA</sub> pre and post-Dox binding and chemical crosslinking *via* BS<sup>3</sup>. Data is reported as the average of three independent trials.

|                                        | $\Theta \times 10^3 \text{ (deg}\cdot\text{cm}^2\cdot\text{dmol}^{-1}\text{)}$ |                 |                                |
|----------------------------------------|--------------------------------------------------------------------------------|-----------------|--------------------------------|
|                                        | $\Theta_{222}$                                                                 | $\Theta_{\min}$ | $\Theta_{222} / \Theta_{\min}$ |
| <b>Q<sub>WT</sub></b>                  | -7.63                                                                          | -16.28          | 0.47                           |
| <b>Q<sub>AHA</sub></b>                 | -5.15                                                                          | -14.25          | 0.36                           |
| <b>Q<sub>WT</sub>•Dox</b>              | -3.50                                                                          | -8.97           | 0.39                           |
| <b>Q<sub>AHA</sub>•Dox</b>             | -2.64                                                                          | -9.06           | 0.30                           |
| <b>Q<sub>WT</sub>•Dox<sub>x</sub></b>  | -11.80                                                                         | -12.16          | 0.97                           |
| <b>Q<sub>AHA</sub>•Dox<sub>x</sub></b> | -6.87                                                                          | -8.44           | 0.81                           |

**Table S5.** IC<sub>50</sub> values of Dox and Q<sub>AHA</sub>-X-CMms6•Dox treatment of MCF-7 cells *in vitro*. IC<sub>50</sub> values calculated from CCK8 cell viability assays of MCF-7 cells treated *in vitro* with Dox and Q<sub>AHA</sub>-X-CMms6•Dox for 24 hr and 48 hr. Data is reported as the mean value ± standard deviation of three independent trials.

| Time  | Treatment                     | IC <sub>50</sub> (μM) |
|-------|-------------------------------|-----------------------|
| 24 hr | Dox                           | 2.92 ± 0.23 (N = 3)   |
|       | Q <sub>AHA</sub> -X-CMms6•Dox | 2.74 ± 0.31 (N = 3)   |
| 48 hr | Dox                           | 1.28 ± 0.22 (N = 3)   |
|       | Q <sub>AHA</sub> -X-CMms6•Dox | 0.48 ± 0.11 (N = 3)   |

**Table S6.** Lattice  $d$ -spacing of USPIOs. Calculated lattice  $d$ -spacing from detectable small angle electron diffraction rings for USPIOs organized by Q<sub>AHA</sub>-X-CMms6 (Q<sub>AHA</sub>-X-CMms6•USPIO) compared to that reported for magnetite. Data is reported as the mean value  $\pm$  standard deviation of three independent trials.

| Ring | Q <sub>AHA</sub> -CMms6•USPIO<br>$d$ -spacing (Å) | Magnetite ( <i>Bragg et al</i> )[1] |
|------|---------------------------------------------------|-------------------------------------|
| 1    | 1.150 $\pm$ 0.00                                  | 1.18                                |
| 2    | 1.33 $\pm$ 0.00                                   | 1.32                                |
| 3    | 1.37 $\pm$ 0.00                                   | 1.37                                |
| 4    | 1.52 $\pm$ 0.00                                   | 1.51                                |
| 5    | 1.65 $\pm$ 0.00                                   | 1.64                                |
| 6    | 1.74 $\pm$ 0.00                                   | 1.74                                |
| 7    | 2.12 $\pm$ 0.01                                   | 2.11                                |
| 8    | 2.55 $\pm$ 0.00                                   | 2.54                                |
| 9    | 2.95 $\pm$ 0.02                                   | 2.97                                |
| 10   | 4.80 $\pm$ 0.04                                   | 4.82                                |

1. Bragg, W.H., *The Structure of Magnetite and the Spinels*. Nature, 1915. **95**(2386): p. 561-561.
